# Supplementary material for: Decelerated Biological Aging Mediates the Association Between Life’s Essential 8 and Mortality in Hypertension: Evidence from NHANES and the Klemera-Doubal Model
Source: Research Square preprint supplement (doi:10.21203/rs.3.rs-6539231/v1), 2025-06-02
Supplement: Supplementary file 1 [file 1f81ec2ba4a1bda75f9594c7.docx]

**Supplementary material**

| **Table S1**. Collinearity analysis |  |
| --- | --- |
| Variables | VIF |
| Gender | 1.047 |
| Race/ethnicity | 1.187 |
| Education | 1.305 |
| Marital status | 1.134 |
| Age | 1.061 |
| PIR | 1.291 |

Abbreviations: VIF, variance inflation factor; PIR,poverty-income ratio.

**Table S2**. Sensitivity analysis of the associations between LE8 and all-cause and CVD mortality after exclusion deaths with a follow-up period of fewer than two years.

| Variables | Model1 | |  | Model2 | |  | Model3 | |
| --- | --- | --- | --- | --- | --- | --- | --- | --- |
| HR (95%CI) | P | HR (95%CI) | P | HR (95%CI) | P |
| All-cause mortality |  |  |  |  |  |  |  |  |
| Low CVH | 1.00 (Reference) |  |  | 1.00 (Reference) |  |  | 1.00 (Reference) |  |
| Moderate CVH | 0.65 (0.51 - 0.82) | <.001 |  | 0.40 (0.32 - 0.51) | <.001 |  | 0.47 (0.36 - 0.60) | <.001 |
| High CVH | 0.38 (0.27 - 0.53) | <.001 |  | 0.18 (0.13 - 0.24) | <.001 |  | 0.23 (0.16 - 0.32) | <.001 |
| Per 10 points increase | 0.83 (0.77 - 0.88) | <.001 |  | 0.69 (0.64 - 0.73) | <.001 |  | 0.73 (0.67 - 0.79) | <.001 |
| Per SD increase | 0.78 (0.72 - 0.85) | <.001 |  | 0.61 (0.56 - 0.67) | <.001 |  | 0.66 (0.59 - 0.73) | <.001 |
| CVD mortality |  |  |  |  |  |  |  |  |
| Low CVH | 1.00 (Reference) |  |  | 1.00 (Reference) |  |  | 1.00 (Reference) |  |
| Moderate CVH | 0.64 (0.42 - 0.98) | 0.038 |  | 0.37 (0.25 - 0.56) | <.001 |  | 0.44 (0.30 - 0.66) | <.001 |
| High CVH | 0.57 (0.32 - 0.99) | 0.049 |  | 0.25 (0.15 - 0.41) | <.001 |  | 0.33 (0.20 - 0.55) | <.001 |
| Per 10 points increase | 0.88 (0.79 - 0.99) | 0.043 |  | 0.73 (0.65 - 0.81) | <.001 |  | 0.78 (0.69 - 0.88) | <.001 |
| Per SD increase | 0.85 (0.73 - 0.99) | 0.043 |  | 0.66 (0.56 - 0.76) | <.001 |  | 0.72 (0.61 - 0.84) | <.001 |

**Table S3.** Sensitivity analysis of the associations between LE8 and all-cause and CVD mortality after exclusion participants over 80 years of age.

| Variables | Model1 | |  | Model2 | |  | Model3 | |
| --- | --- | --- | --- | --- | --- | --- | --- | --- |
| HR (95%CI) | P | HR (95%CI) | P | HR (95%CI) | P |
| All-cause mortality |  |  |  |  |  |  |  |  |
| Low CVH | 1.00 (Reference) |  |  | 1.00 (Reference) |  |  | 1.00 (Reference) |  |
| Moderate CVH | 0.46 (0.37 - 0.57) | <.001 |  | 0.36 (0.28 - 0.45) | <.001 |  | 0.43 (0.34 - 0.56) | <.001 |
| High CVH | 0.16 (0.10 - 0.26) | <.001 |  | 0.11 (0.07 - 0.17) | <.001 |  | 0.15 (0.09 - 0.23) | <.001 |
| Per 10 points increase | 0.71 (0.67 - 0.77) | <.001 |  | 0.64 (0.59 - 0.69) | <.001 |  | 0.69 (0.63 - 0.75) | <.001 |
| Per SD increase | 0.64 (0.59 - 0.71) | <.001 |  | 0.55 (0.50 - 0.61) | <.001 |  | 0.61 (0.54 - 0.69) | <.001 |
| CVD mortality |  |  |  |  |  |  |  |  |
| Low CVH | 1.00 (Reference) |  |  | 1.00 (Reference) |  |  | 1.00 (Reference) |  |
| Moderate CVH | 0.40 (0.27 - 0.60) | <.001 |  | 0.31 (0.21 - 0.47) | <.001 |  | 0.39 (0.26 - 0.58) | <.001 |
| High CVH | 0.17 (0.07 - 0.40) | <.001 |  | 0.11 (0.05 - 0.25) | <.001 |  | 0.16 (0.07 - 0.36) | <.001 |
| Per 10 points increase | 0.71 (0.63 - 0.79) | <.001 |  | 0.63 (0.56 - 0.70) | <.001 |  | 0.68 (0.61 - 0.77) | <.001 |
| Per SD increase | 0.63 (0.55 - 0.73) | <.001 |  | 0.54 (0.47 - 0.63) | <.001 |  | 0.60 (0.52 - 0.71) | <.001 |

**Table S4.** Sensitivity analysis of the associations betweenLE8 and all-cause and CVD mortality after additional adjustment for antihypertensive treatment.

| Variables | Model1 | |  | Model2 | |  | Model3 | |
| --- | --- | --- | --- | --- | --- | --- | --- | --- |
| HR (95%CI) | P | HR (95%CI) | P | HR (95%CI) | P |
| All-cause mortality |  |  |  |  |  |  |  |  |
| Low CVH | 1.00 (Reference) |  |  | 1.00 (Reference) |  |  | 1.00 (Reference) |  |
| Moderate CVH | 0.68 (0.54 - 0.84) | <.001 |  | 0.39 (0.31 - 0.50) | <.001 |  | 0.46 (0.36 - 0.58) | <.001 |
| High CVH | 0.36 (0.26 - 0.52) | <.001 |  | 0.16 (0.12 - 0.23) | <.001 |  | 0.21 (0.15 - 0.30) | <.001 |
| Per 10 points increase | 0.82 (0.77 - 0.88) | <.001 |  | 0.67 (0.62 - 0.71) | <.001 |  | 0.71 (0.66 - 0.77) | <.001 |
| Per SD increase | 0.77 (0.71 - 0.84) | <.001 |  | 0.59 (0.54 - 0.64) | <.001 |  | 0.64 (0.58 - 0.71) | <.001 |
| CVD mortality |  |  |  |  |  |  |  |  |
| Low CVH | 1.00 (Reference) |  |  | 1.00 (Reference) |  |  | 1.00 (Reference) |  |
| Moderate CVH | 0.68 (0.45 - 1.04) | 0.073 |  | 0.38 (0.26 - 0.57) | <.001 |  | 0.46 (0.30 - 0.68) | <.001 |
| High CVH | 0.51 (0.28 - 0.94) | 0.032 |  | 0.22 (0.13 - 0.37) | <.001 |  | 0.30 (0.18 - 0.50) | <.001 |
| Per 10 points increase | 0.87 (0.78 - 0.99) | 0.030 |  | 0.71 (0.63 - 0.80) | <.001 |  | 0.76 (0.68 - 0.86) | <.001 |
| Per SD increase | 0.84 (0.72 - 0.98) | 0.030 |  | 0.64 (0.55 - 0.74) | <.001 |  | 0.70 (0.60 - 0.82) | <.001 |

**Table S5**. Sensitivity analysis of the associations between LE8 and all-cause and CVD mortality after exclusion participants without complex survey design.

| Variables | Model1 | |  | Model2 | |  | Model3 | |
| --- | --- | --- | --- | --- | --- | --- | --- | --- |
| HR (95%CI) | P | HR (95%CI) | P | HR (95%CI) | P |
| All-cause mortality |  |  |  |  |  |  |  |  |
| Low CVH | 1.00 (Reference) |  |  | 1.00 (Reference) |  |  | 1.00 (Reference) |  |
| Moderate CVH | 0.81 (0.71 ~ 0.93) | 0.002 |  | 0.53 (0.46 ~ 0.61) | <.001 |  | 0.59 (0.51 ~ 0.68) | <.001 |
| High CVH | 0.55 (0.45 ~ 0.68) | <.001 |  | 0.27 (0.22 ~ 0.33) | <.001 |  | 0.33 (0.27 ~ 0.41) | <.001 |
| Per 10 points increase | 0.90 (0.86 ~ 0.93) | <.001 |  | 0.76 (0.73 ~ 0.79) | <.001 |  | 0.80 (0.76 ~ 0.83) | <.001 |
| Per SD increase | 0.87 (0.83 ~ 0.91) | <.001 |  | 0.69 (0.66 ~ 0.73) | <.001 |  | 0.74 (0.70 ~ 0.78) | <.001 |
| CVD mortality |  |  |  |  |  |  |  |  |
| Low CVH | 1.00 (Reference) |  |  | 1.00 (Reference) |  |  | 1.00 (Reference) |  |
| Moderate CVH | 0.72 (0.57 ~ 0.90) | 0.005 |  | 0.46 (0.36 ~ 0.58) | <.001 |  | 0.51 (0.40 ~ 0.65) | <.001 |
| High CVH | 0.64 (0.46 ~ 0.90) | 0.009 |  | 0.30 (0.21 ~ 0.43) | <.001 |  | 0.37 (0.26 ~ 0.52) | <.001 |
| Per 10 points increase | 0.91 (0.85 ~ 0.97) | 0.005 |  | 0.76 (0.71 ~ 0.82) | <.001 |  | 0.80 (0.74 ~ 0.86) | <.001 |
| Per SD increase | 0.88 (0.81 ~ 0.96) | 0.005 |  | 0.70 (0.64 ~ 0.77) | <.001 |  | 0.75 (0.68 ~ 0.82) | <.001 |
